# Supplementary material for: Does aneurysm side influence the infarction side and patients´ outcome after subarachnoid hemorrhage?
Source: PLoS One. 2019 Nov 7;14(11):e0224013. doi: 10.1371/journal.pone.0224013 (PMC6837438; doi:10.1371/journal.pone.0224013)
Supplement: S1 File — (XLS) [file pone.0224013.s002.xls]

## Sheet: Data
Patient number	patient age	patient sex (1= female, 2= male)	aneurysm side (1 = right- sided, = left-sided)	WFNS at admission	Fisher	early hydrocephalus	shunt	CVS (vessel reduction in%)	Coiling	mRS	left- sided infarctions	right-sided infarctions	no infarctions
1	51	1	2	5	3	0	0	20	0	2	0	0	1
2	35	1	2	1	3	0	0	0	1	1	1	0	0
3	81	1	2	5	3	1	0	0	0	6	0	0	1
4	70	2	2	4	3	0	0	70	1	6	0	0	0
5	68	1	2	2	3	1	1	90	0	2	0	0	1
6	44	1	2	2	3	1	0	80	1	1	0	0	1
7	32	1	2	5	4	1	0	0	0	1	0	0	1
8	48	1	1	1	1	0	0	0	1	0	0	0	1
9	56	1	2	3	3	0	0	0	1	0	0	0	1
10	51	2	2	2	3	1	1	20	0	1	0	0	1
11	42	1	2	4	3	1	0	90	0	5	0	0	1
12	57	1	2	1	1	0	0	0	1	1	0	0	1
13	62	2	2	5	4	1	0	0	0	3	1	0	0
14	62	2	2	5	4	1	0	0	0	3	1	0	0
15	54	1	2	2	3	0	0	40	1	1	0	0	1
16	48	1	2	5	3	1	0	90	1	6	0	0	0
17	68	1	2	5	3	1	0	0	0	6	0	0	1
18	60	2	2	5	3	1	1	0	0	5	0	0	1
19	37	1	2	5	3	1	1	80	1	4	0	0	1
20	69	1	1	1	2	0	0	0	1	0	0	0	1
21	60	2	2	5	3	1	0	0	0	2	0	0	1
22	72	1	2	4	3	1	1	30	0	3	0	0	1
23	48	1	2	2	2	1	0	0	1	1	0	0	1
24	82	1	2	3	3	1	0	0	1	6	1	0	0
25	63	2	2	3	1	0	0	0	1	2	1	0	0
26	49	1	2	5	3	1	0	30	1	1	0	0	1
27	51	2	2	3	3	0	0	0	1	0	0	0	1
28	41	1	2	2	3	1	0	50	0	3	0	0	1
29	40	1	2	2	3	0	0	0	1	1	0	0	1
30	67	2	2	5	3	1	0	0	1	6	0	0	1
31	64	1	2	2	3	1	0	25	0	1	1	0	0
32	60	2	2	5	4	0	0	0	0	6	0	0	1
33	67	2	2	1	2	0	0	0	0	0	0	0	1
34	41	1	1	4	3	1	1	90	1	2	0	1	0
35	77	1	2	5	4	1	1	0	1	3	0	0	1
36	46	1	2	5	3	1	0	80	1	6	0	0	0
37	51	1	2	1	3	0	0	0	1	1	0	0	0
38	46	2	2	2	3	0	0	0	0	2	0	0	1
39	37	1	2	3	3	1	0	80	1	3	1	0	0
40	72	1	2	5	3	1	0	0	1	4	0	0	1
41	42	1	2	1	3	0	0	0	0	1	0	0	1
42	68	2	2	1	4	0	0	50	0	4	0	0	1
43	68	1	2	2	3	1	0	90	0	3	1	0	0
44	52	2	2	4	3	1	0	0	1	2	0	0	1
45	49	1	2	2	3	0	0	80	0	0	1	0	0
46	33	1	2	1	3	1	0	60	1	1	0	0	1
47	63	1	2	5	3	1	0	80	0	4	1	0	0
48	56	1	2	1	2	0	0	0	0	1	0	0	1
49	39	1	2	5	3	0	0	20	1	1	1	0	0
50	43	1	2	5	3	1	1	90	0	1	0	0	1
51	26	1	2	2	3	1	1	0	0	0	0	0	1
52	50	2	2	1	3	0	0	80	0	5	0	0	1
53	65	1	2	3	3	1	1	80	0	2	0	0	1
54	51	1	2	5	3	1	0	0	0	1	0	0	1
55	41	1	2	2	3	1	0	70	1	1	0	0	1
56	44	2	2	3	3	1	1	40	1	1	0	0	1
57	66	1	2	5	3	0	0	60	1	3	0	0	1
58	55	1	2	5	4	1	0	0	1	3	1	0	0
59	74	1	2	5	3	1	0	0	0	6	0	0	1
60	37	1	2	4	4	1	0	0	0	3	0	1	0
61	30	1	2	4	4	1	0	0	1	3	0	0	1
62	59	1	2	4	3	1	1	0	1	2	0	0	0
63	68	1	2	2	4	1	1	0	1	0	0	0	1
64	44	2	2	2	1	0	0	0	0	1	0	0	1
65	65	1	2	2	3	1	0	0	1	0	0	0	1
66	61	1	2	1	1	0	0	0	1	1	0	0	1
67	42	1	2	1	3	0	0	0	1	1	0	0	1
68	46	1	2	2	2	1	0	0	1	1	0	0	1
69	56	1	2	4	3	1	1	60	1	3	1	0	0
70	70	2	2	1	3	1	1	30	1	3	0	0	1
71	55	1	2	1	3	1	0	70	0	1	0	0	1
72	77	1	2	2	3	1	0	0	0	6	0	0	1
73	39	1	2	5	3	1	0	90	1	6	0	0	0
74	45	1	2	4	3	1	1	80	0	5	0	0	1
75	48	1	2	5	3	1	1	0	0	6	0	0	1
76	24	2	2	1	3	0	0	0	1	0	0	0	1
77	55	1	2	1	2	0	0	0	1	0	0	0	1
78	56	2	2	1	3	0	0	0	0	0	1	0	0
79	54	1	2	1	3	0	0	0	1	0	0	0	1
80	51	1	2	4	3	1	0	50	0	2	0	0	1
81	56	1	2	5	3	1	1	20	1	5	1	0	0
82	36	2	2	3	3	1	0	0	0	1	0	0	1
83	43	1	2	3	3	1	0	50	1	6	0	0	1
84	46	1	2	5	3	1	0	70	0	6	0	0	0
85	46	1	2	1	3	0	0	0	1	0	0	0	1
86	49	1	2	2	3	1	0	80	1	6	0	0	0
87	35	2	2	5	3	1	0	90	0	6	0	0	1
88	41	2	2	4	3	1	0	0	0	2	1	0	0
89	54	1	2	3	3	0	0	0	0	1	0	0	1
90	62	2	2	5	3	1	0	0	1	0	0	0	1
91	32	1	2	4	3	1	0	0	0	0	0	0	1
92	57	1	2	2	3	1	1	40	0	2	0	0	1
93	69	1	2	1	4	0	0	60	1	0	0	0	1
94	23	1	2	1	2	0	0	30	1	0	0	0	1
95	44	1	2	5	3	1	0	0	1	1	0	0	1
96	40	1	2	1	3	0	0	70	0	0	1	0	0
97	36	1	2	2	2	1	0	50	0	1	0	0	1
98	21	1	2	3	3	1	0	70	1	0	0	0	1
99	63	1	2	1	4	1	0	0	1	1	0	0	1
100	84	2	2	1	3	0	0	0	0	6	0	0	1
101	75	1	2	5	3	1	0	0	1	6	0	0	1
102	39	1	2	1	3	0	0	30	1	1	0	0	1
103	63	2	2	3	3	1	0	30	1	0	0	1	0
104	85	1	2	5	3	1	0	0	0	4	0	0	1
105	43	1	2	1	2	0	0	20	0	0	0	0	1
106	70	1	2	2	3	0	0	70	1	3	0	0	1
107	68	1	2	1	3	0	0	30	0	2	1	0	0
108	57	1	2	5	4	0	0	70	0	2	0	0	1
109	82	1	2	4	3	0	0	25	1	4	0	0	0
110	72	2	2	4	4	1	0	30	0	1	0	0	1
111	73	2	2	5	3	1	0	0	1	5	1	0	0
112	73	2	2	5	3	1	1	0	0	5	1	0	0
113	69	1	2	5	4	1	0	0	0	6	0	0	1
114	30	1	2	3	3	0	1	70	1	5	1	0	0
115	47	2	2	3	3	1	0	0	1	0	0	0	1
116	49	1	2	5	3	1	0	90	1	6	0	0	0
117	46	2	2	5	3	1	0	30	1	5	1	0	0
118	81	1	2	2	3	1	0	0	1	5	0	0	1
119	24	1	1	1	3	0	0	0	1	0	0	0	1
120	55	1	2	5	3	1	0	80	0	6	0	0	1
121	70	1	2	5	3	1	0	0	0	6	1	0	0
122	64	1	2	4	4	0	0	50	1	2	0	0	1
123	45	2	2	4	3	1	0	50	0	3	1	0	0
124	51	1	2	4	3	1	0	0	0	6	0	0	1
125	45	1	2	5	3	0	0	0	1	3	0	0	1
126	37	2	2	5	3	1	0	40	1	5	0	0	0
127	57	1	2	3	3	0	0	70	1	1	1	0	0
128	58	1	2	5	4	1	1	0	0	5	0	0	1
129	28	1	2	1	3	1	0	30	0	0	0	0	1
130	58	1	2	3	3	1	0	0	1	0	0	0	1
131	73	1	2	3	3	1	1	0	0	5	0	0	1
132	49	1	2	1	3	1	0	0	0	1	0	0	1
133	38	1	2	4	3	1	0	0	1	5	1	0	0
134	57	1	2	2	3	1	0	70	1	1	0	0	1
135	53	1	2	5	3	1	1	80	1	1	0	0	0
136	59	2	2	1	3	1	1	50	0	2	0	0	1
137	48	2	1	5	3	1	0	0	0	6	0	0	0
138	59	1	2	4	3	1	0	0	1	4	1	0	0
139	87	1	2	4	3	0	1	0	1	3	0	0	1
140	54	1	2	1	2	0	1	0	0	1	0	0	1
141	53	1	2	5	3	0	0	50	0	4	1	0	0
142	63	1	2	5	4	1	1	0	0	4	0	0	1
143	44	1	2	5	2	1	0	30	1	1	0	0	1
144	65	1	2	5	3	1	0	0	0	6	0	0	1
145	42	1	2	2	3	0	0	0	1	1	0	0	1
146	65	1	2	5	3	1	0	0	1	6	0	0	1
147	70	1	2	5	3	1	1	70	0	4	0	0	0
148	72	1	2	3	3	1	1	30	0	5	0	0	1
149	57	1	1	5	3	1	1	0	1	1	0	0	1
150	51	1	1	5	3	1	1	70	1	1	0	1	0
151	29	2	2	1	1	0	0	0	0	0	0	0	1
152	72	2	1	5	3	1	1	0	1	3	0	0	1
153	48	2	2	5	3	1	0	10	0	0	0	0	1
154	59	2	1	1	2	0	0	0	0	0	0	0	1
155	50	2	2	3	3	0	0	70	0	0	0	0	1
156	49	1	1	1	2	0	0	95	0	3	0	1	0
157	61	1	1	5	3	1	0	90	1	5	0	1	0
158	44	1	1	1	2	0	0	0	1	0	0	0	1
159	33	1	1	1	3	0	0	70	1	1	0	0	1
160	58	1	1	5	3	1	0	70	0	6	0	1	0
161	57	1	1	1	3	0	0	50	1	0	0	0	1
162	57	1	1	1	3	0	0	0	1	0	0	0	1
163	46	1	1	2	3	1	0	90	0	0	0	1	0
164	57	1	1	4	3	1	0	0	0	6	0	1	0
165	65	1	1	4	3	1	0	0	1	1	0	0	1
166	43	1	1	5	4	1	0	20	0	2	0	0	1
167	46	1	1	3	3	0	0	0	0	1	0	0	1
168	63	2	1	1	1	0	0	0	1	0	0	0	1
169	39	1	1	1	3	0	0	20	0	2	0	0	1
170	34	2	2	2	2	0	0	40	0	0	0	0	1
171	53	2	1	1	2	0	0	0	1	1	0	0	1
172	68	1	1	2	3	1	1	70	0	6	0	0	1
173	57	1	2	3	3	1	0	0	1	0	0	0	1
174	68	1	1	5	3	1	0	30	0	6	0	1	0
175	53	1	1	5	3	1	1	90	0	0	0	1	0
176	43	2	1	4	3	1	0	90	0	4	0	1	0
177	63	1	1	2	3	0	0	30	0	1	0	0	1
178	72	1	2	5	3	1	0	80	0	6	0	0	0
179	60	1	1	1	3	0	0	30	1	1	0	0	1
180	70	2	1	1	3	0	0	30	1	1	0	0	1
181	47	1	1	5	4	0	0	60	0	2	0	0	1
182	56	1	1	2	3	1	0	0	1	0	0	0	1
183	71	1	1	5	3	1	1	0	1	3	0	0	1
184	71	2	1	3	2	0	0	0	1	2	0	0	1
185	39	2	1	5	3	1	0	40	0	1	0	0	1
186	71	1	1	5	3	1	0	0	0	0	0	0	1
187	74	1	2	1	3	0	0	0	1	0	0	0	1
188	58	1	1	2	2	1	0	20	0	3	0	0	1
189	62	1	1	1	3	1	0	0	1	1	0	1	0
190	45	2	1	3	3	0	0	0	0	0	0	1	0
191	50	1	1	1	3	0	0	0	1	0	0	0	1
192	34	1	1	1	3	0	0	0	1	0	0	0	1
193	48	1	1	3	3	1	0	90	1	1	0	1	0
194	56	1	1	2	4	0	0	0	0	0	0	0	1
195	53	1	1	1	1	0	0	0	1	1	0	0	1
196	65	1	1	5	3	1	0	30	0	3	0	1	0
197	81	1	1	5	3	1	0	90	1	3	0	1	0
198	50	1	1	3	3	0	0	0	1	0	0	0	1
199	44	2	1	3	4	1	0	0	1	0	0	1	0
200	58	1	1	5	3	1	1	0	1	1	0	0	1
201	48	1	1	1	3	0	0	0	0	0	0	0	1
202	62	2	1	3	3	1	0	33	0	2	0	0	1
203	93	1	1	1	3	0	0	60	1	6	0	1	0
204	79	1	1	2	2	0	0	0	1	2	0	0	1
205	42	1	1	1	3	1	0	70	0	2	0	1	0
206	55	1	1	5	3	1	1	90	1	3	0	1	0
207	35	1	1	5	3	1	1	90	0	4	0	0	1
208	62	1	1	3	3	1	0	90	0	4	0	1	0
209	67	2	1	4	3	1	0	0	1	3	0	0	1
210	55	1	1	5	3	1	1	20	0	4	0	1	0
211	65	2	1	4	3	1	0	0	0	4	0	0	1
212	47	1	1	1	3	0	0	0	1	1	0	0	1
213	49	1	1	2	3	1	1	20	0	0	0	1	0
214	55	1	2	1	1	0	0	0	1	1	0	0	1
215	54	1	1	5	4	1	0	0	0	6	0	1	0
216	79	1	1	1	0	0	0	0	0	5	0	0	1
217	47	1	2	2	3	0	0	0	0	6	0	0	1
218	90	1	1	1	3	0	0	0	1	2	0	0	1
219	60	2	1	3	3	1	0	33	0	3	0	0	1
220	75	1	1	5	1	0	0	0	0	5	0	1	0
221	57	1	1	4	3	1	0	80	1	6	0	1	0
222	58	1	2	1	2	0	1	0	0	0	0	0	1
223	60	1	2	5	3	1	0	0	0	6	0	0	1
224	45	1	1	1	2	1	0	30	0	2	0	0	1
225	76	2	1	4	3	1	1	0	0	3	0	1	0
226	77	2	1	1	1	0	0	50	0	0	0	1	0
227	60	1	1	1	3	1	1	0	0	1	0	1	0
228	37	1	2	5	4	0	0	60	0	0	0	0	1
229	52	2	1	2	3	1	0	0	1	1	0	1	0
230	62	2	2	5	3	1	0	80	0	0	0	1	0
231	57	2	1	1	3	0	0	30	0	0	0	0	1
232	49	1	1	4	3	1	1	0	0	0	0	1	0
233	44	1	1	2	3	1	0	30	0	1	0	0	1
234	26	1	1	1	2	0	0	60	0	2	0	1	0
235	66	1	1	4	3	1	0	0	0	0	0	0	1
236	81	1	1	3	2	0	0	0	1	1	0	0	1
237	53	1	1	1	2	1	1	70	0	5	0	0	1
238	51	2	2	5	3	1	0	0	0	6	0	1	0
239	79	1	2	5	3	1	0	50	0	6	0	0	1
240	40	1	1	2	3	0	0	40	1	0	0	0	1
241	47	1	1	1	2	0	0	0	1	1	0	0	1
242	56	1	1	3	4	1	0	0	0	1	0	0	1
243	58	1	1	5	3	1	0	30	0	1	0	1	0
244	42	2	1	1	4	0	0	40	0	0	0	0	1
245	41	2	2	3	3	0	0	0	0	0	0	0	1
246	46	1	2	1	3	0	0	0	1	1	0	0	1
247	36	1	1	1	2	0	0	30	0	0	0	0	1
248	50	2	1	1	4	1	0	0	0	1	0	0	1
249	46	1	1	1	3	0	0	0	0	2	0	0	1
250	46	1	1	1	3	0	0	50	1	1	0	0	1
251	59	1	1	1	3	1	0	20	0	1	0	0	1
252	37	1	1	1	3	0	0	50	1	5	0	1	0
253	43	1	2	5	3	1	1	20	0	4	1	0	0
254	51	1	1	5	3	1	1	0	1	0	0	0	1
255	42	2	1	3	1	1	0	0	1	1	0	1	0
256	62	2	1	2	3	1	0	0	0	6	0	1	0
257	40	1	1	1	4	0	0	20	0	2	0	0	1
258	68	1	1	1	3	0	0	50	1	1	0	0	1
259	56	2	2	5	4	0	0	40	0	2	0	0	1
260	34	1	1	2	3	1	0	0	0	0	0	0	1
261	37	1	1	4	4	0	0	0	1	6	0	0	1
262	43	1	1	5	3	1	0	40	1	6	0	0	1
263	67	1	2	2	2	0	0	0	0	0	0	1	0
264	57	1	1	1	1	0	0	0	1	0	0	0	1
265	78	1	1	1	4	0	1	70	1	4	0	1	0
266	50	1	1	2	3	1	0	0	1	0	0	0	1
267	62	1	1	5	4	1	0	0	0	6	0	0	1
268	49	1	2	1	3	1	1	0	1	3	0	1	0
269	69	1	1	3	3	1	1	0	1	0	0	0	1
270	28	1	1	5	3	1	1	80	1	0	0	0	1
271	58	1	2	5	3	1	0	0	0	0	0	0	1
272	76	1	1	5	3	1	0	0	0	0	0	0	1
273	50	2	1	2	3	0	0	0	0	6	0	0	1
274	64	1	1	2	3	1	0	0	0	1	0	0	1
275	35	1	2	4	3	1	0	0	0	6	0	0	1
276	47	1	1	1	2	0	0	30	1	1	0	1	0
277	57	1	1	5	3	1	0	30	1	3	0	0	1
278	64	2	1	5	4	1	0	0	1	6	0	0	1
279	52	1	1	5	3	1	0	0	1	2	0	0	1
280	48	2	1	1	3	1	0	0	1	1	0	0	1
281	38	2	1	5	3	0	0	80	1	2	0	1	0
282	54	1	1	5	3	1	0	33	1	2	0	1	0
283	75	1	1	4	3	1	0	50	0	6	0	1	0
284	48	1	2	4	4	1	1	50	0	4	0	0	1
285	44	1	1	2	3	1	0	60	0	1	0	0	1
286	56	2	1	1	2	0	0	0	0	0	0	0	1
287	69	1	1	5	3	1	0	50	1	2	0	1	0
288	77	1	1	1	3	0	1	50	0	6	0	0	1
289	92	1	1	5	4	0	0	0	0	6	0	0	1
290	32	1	1	4	3	1	0	0	1	6	0	0	1
291	39	1	1	3	3	0	0	90	1	4	0	1	0
292	55	2	1	5	4	1	1	60	1	0	0	0	0
293	53	2	1	1	3	1	0	60	1	6	0	0	1
294	62	1	1	4	3	1	1	30	0	4	0	0	1
295	55	1	1	4	3	0	0	30	0	0	0	1	0
296	67	2	2	2	3	1	0	0	0	0	0	1	0
297	47	2	1	5	3	1	0	0	1	3	0	0	1
298	72	1	1	3	3	0	1	90	0	6	0	1	0
299	45	1	1	5	4	1	0	90	0	0	0	0	1
300	63	1	1	5	3	1	1	30	1	1	0	0	1
301	45	1	1	3	4	0	0	90	1	2	0	1	0
302	40	1	1	1	2	0	0	0	1	0	0	0	1
303	60	1	1	5	3	1	0	0	0	5	0	1	0
304	50	1	1	1	4	0	0	0	0	1	0	1	0
305	39	1	1	2	3	0	0	60	0	1	0	0	1
306	83	1	1	1	3	1	0	0	0	0	0	1	0
307	33	2	1	1	3	1	0	90	1	3	0	0	1
308	55	2	1	5	3	1	0	0	0	3	0	1	0
309	55	1	1	1	3	0	0	30	0	1	0	1	0
310	70	2	1	5	3	1	0	85	0	1	0	1	0
311	37	2	1	4	4	1	0	10	0	2	0	0	1
312	46	1	2	4	4	0	0	0	1	4	1	0	1
313	49	1	2	1	2	0	0	0	1	1	0	0	1
314	47	1	1	5	3	1	0	0	1	6	0	0	1
315	46	1	1	2	2	0	0	0	1	2	0	0	1
316	69	1	1	4	3	0	1	0	0	3	0	1	0
317	72	1	1	5	3	1	0	0	0	6	0	0	1
318	80	1	1	5	2	0	0	0	1	6	0	0	1
319	43	1	1	5	3	0	0	0	0	3	0	0	1
320	60	1	2	5	3	1	1	50	0	5	0	0	0
321	46	1	1	3	3	0	0	0	0	1	0	1	0
322	62	1	2	1	2	0	0	0	0	0	0	0	1
323	47	1	2	4	4	0	1	40	1	5	1	0	0
324	47	1	2	4	3	1	1	20	1	0	1	0	0
325	57	2	1	4	4	0	0	0	0	5	0	0	1
326	45	1	1	1	1	0	0	0	0	0	0	0	1
327	40	1	1	1	3	1	0	60	0	1	0	0	1
328	55	2	1	1	3	0	0	80	0	0	0	0	1
329	60	2	2	5	4	1	1	50	0	1	0	0	1
330	53	1	2	5	3	0	0	0	1	0	0	0	1
331	55	1	1	5	2	1	0	0	1	1	0	0	1
332	61	1	1	2	3	1	1	60	0	3	0	1	0
333	42	1	1	5	4	1	0	0	1	2	0	0	1
334	63	1	2	5	3	1	0	0	1	1	0	0	1
335	33	2	1	5	3	1	0	30	0	2	0	1	0
336	52	2	1	4	3	1	1	60	1	0	0	0	1
337	49	1	1	2	1	0	0	0	1	0	0	0	1
338	60	1	1	5	3	1	0	0	0	6	0	1	0
339	48	1	1	2	3	0	0	0	1	0	0	0	1
340	53	1	1	1	2	0	0	0	1	0	0	0	1
341	52	2	1	1	3	0	0	0	0	1	0	0	1
342	47	2	2	3	4	0	0	30	0	0	0	0	1
343	39	2	2	5	3	1	0	0	0	6	0	0	1
344	35	1	1	5	3	0	0	0	0	1	0	0	1
345	53	1	1	4	3	1	0	60	1	4	0	0	0
346	51	1	1	5	3	1	0	0	0	0	0	0	1
347	51	1	1	1	2	0	0	30	0	1	0	0	1
348	73	2	1	5	3	1	0	75	1	6	0	0	1
349	47	1	1	1	2	0	0	0	0	2	0	0	1
350	85	1	1	5	3	1	0	0	1	1	0	0	1
351	51	2	1	4	3	1	1	50	0	5	0	0	1
352	71	1	1	1	2	0	0	70	0	4	0	1	0
353	53	2	1	2	3	1	0	0	0	2	0	1	0
354	48	2	1	1	2	0	0	0	1	0	0	0	1
355	46	1	1	4	3	1	1	40	0	1	0	0	1
356	48	1	1	1	3	0	0	0	1	0	0	0	1
357	50	1	1	1	3	1	0	0	1	0	0	0	1
358	37	2	1	5	3	0	0	60	0	0	0	0	1
359	69	1	1	3	3	0	0	60	1	2	0	1	0
360	54	2	1	5	3	1	0	0	1	3	0	1	0
361	63	1	1	2	3	1	0	30	0	0	0	0	1
362	35	1	1	1	3	0	0	0	1	0	0	0	1
363	54	1	1	2	3	1	0	75	0	0	0	1	0
364	50	1	1	1	3	1	0	0	0	1	0	0	1
365	17	2	1	4	3	1	1	90	1	5	0	1	0
366	38	1	1	4	4	1	0	0	1	3	0	0	1
367	50	2	1	2	3	1	1	70	0	5	0	0	1
368	48	1	1	5	3	1	0	0	1	3	0	0	1
369	51	1	1	5	3	1	0	0	1	0	0	0	1
370	45	1	2	5	3	1	0	60	0	4	0	0	1
371	41	1	1	5	3	1	1	65	0	4	0	1	0
372	51	1	2	5	4	0	0	10	0	0	0	0	1
373	44	2	1	1	2	0	0	0	1	0	0	0	1
374	44	1	2	1	2	0	0	0	1	1	0	0	1
375	75	1	1	1	3	0	0	0	1	0	0	1	0
376	82	2	2	5	3	1	0	0	1	6	0	0	1
377	51	1	1	4	3	1	1	30	0	1	0	0	1
378	77	1	2	3	1	0	0	0	1	1	0	0	1
379	48	2	1	5	4	1	1	20	0	0	0	0	1
380	39	2	1	3	2	0	0	40	0	0	0	0	1
381	48	1	1	5	3	1	0	20	1	1	0	0	1
382	43	1	2	5	2	1	1	0	1	0	0	0	1
383	41	1	1	2	3	0	0	50	0	0	0	0	1
384	50	1	1	1	3	0	0	0	0	0	0	1	0
385	57	2	1	3	3	0	0	0	0	6	0	1	0
386	57	1	1	1	2	0	1	0	0	2	0	0	1
387	42	1	1	1	2	1	0	0	0	1	0	0	1
388	38	1	2	5	3	1	0	20	0	0	0	0	1
389	63	2	1	1	3	0	0	0	1	2	0	0	1
390	42	1	1	2	3	0	0	90	0	1	0	0	1
391	52	2	1	5	3	1	1	70	0	0	0	0	1
392	51	1	1	1	3	0	0	90	0	0	0	0	1
393	37	1	2	1	3	0	0	0	1	1	0	0	1
394	50	1	1	1	3	0	0	10	0	1	0	0	1
395	73	1	2	4	3	1	0	0	1	0	0	0	1
396	74	1	1	2	3	1	1	0	1	4	0	0	1
397	58	2	1	1	3	0	0	90	0	0	0	1	0
398	43	2	1	2	4	0	0	20	1	0	0	0	1
399	46	1	1	5	1	1	1	0	0	5	0	1	0
400	61	1	1	1	3	0	0	0	1	0	0	0	1
401	42	2	2	1	3	1	0	0	0	1	0	0	1
402	78	1	1	5	3	1	0	0	0	4	0	0	1
403	51	2	1	4	3	0	0	0	1	5	0	0	1
404	81	1	1	1	4	0	0	0	1	0	0	0	1
405	49	1	1	4	4	0	0	0	0	2	0	1	0
406	33	1	1	1	3	0	0	0	1	0	0	0	1
407	53	1	2	1	4	0	0	0	0	1	0	0	1
408	57	1	1	5	4	1	0	0	0	6	0	0	1
409	71	1	1	4	3	1	1	40	0	5	0	1	0
410	80	1	1	1	3	1	0	0	1	5	0	1	0
411	55	1	1	1	4	0	0	20	0	2	0	0	1
412	53	1	1	5	3	1	0	0	0	0	0	1	0
413	40	1	1	1	1	0	0	0	1	0	0	0	1
414	30	2	1	1	2	0	0	70	0	1	0	0	1
415	58	1	2	5	3	1	1	80	1	4	0	0	1
416	76	1	2	3	3	1	1	0	1	2	0	0	1
417	50	2	1	1	3	1	0	50	1	1	0	0	1
418	54	1	1	2	3	1	0	50	1	0	0	0	1
419	42	2	1	1	3	1	0	75	0	4	0	0	1
420	68	1	2	3	3	1	0	80	0	0	0	0	1
421	59	1	1	5	3	1	0	0	0	2	0	0	1
422	74	1	1	5	3	1	0	0	1	6	0	0	1
423	49	1	1	5	3	1	0	70	1	6	0	0	1
424	43	2	1	4	2	1	0	0	0	3	0	0	1
425	59	1	1	5	3	1	1	80	1	4	0	1	0
426	71	1	1	4	4	0	0	20	0	3	0	1	0
427	32	1	1	2	2	0	0	0	1	1	0	0	1
428	54	1	1	4	3	1	0	20	0	2	0	0	1
429	54	2	2	2	3	1	0	0	0	0	0	0	1
430	71	1	1	2	3	0	0	60	1	4	0	1	0
431	40	1	1	5	3	1	0	0	0	1	0	0	1
432	61	1	1	1	2	0	0	0	1	0	0	0	1
433	47	2	2	5	3	1	1	90	0	6	0	0	1
434	60	1	1	1	3	1	1	60	0	1	0	0	1
435	54	2	1	5	3	1	0	0	0	6	0	0	1
436	37	2	1	2	3	1	1	20	1	1	0	0	1
437	46	1	1	1	3	0	0	0	1	0	0	0	1
438	45	1	1	1	2	1	0	80	0	0	0	1	0
439	50	2	1	1	3	0	0	0	1	0	0	0	1
440	55	1	1	2	3	1	0	0	0	3	0	0	1
441	40	1	1	1	3	0	0	0	0	0	0	0	1
442	45	1	2	3	4	0	0	90	0	3	1	0	0
443	53	1	1	1	3	1	0	0	0	1	1	0	0
444	49	1	2	5	3	1	0	0	0	3	1	0	0
445	87	1	2	3	3	0	0	40	1	5	1	0	0
446	47	1	1	4	3	0	0	0	0	4	0	0	0
447	52	1	1	5	3	1	0	50	1	3	0	0	0
448	55	1	1	5	4	1	1	60	0	3	0	0	0
449	50	1	1	4	3	1	0	40	0	1	1	0	0
450	67	1	1	5	4	1	1	30	1	1	0	0	0
451	59	1	2	5	3	1	0	60	0	4	1	0	0
452	83	1	2	5	3	1	0	0	0	6	1	0	0
453	76	2	2	1	2	1	0	50	1	6	1	0	0
454	75	1	1	2	3	1	0	0	0	0	0	0	0
455	53	1	2	2	3	1	0	0	0	0	1	0	0
456	80	1	1	4	3	1	0	80	0	6	0	0	0
457	59	1	1	3	3	1	0	50	0	0	0	0	0
458	50	1	1	5	3	0	0	60	0	1	1	0	0
459	68	1	2	5	3	1	0	0	0	0	1	0	0
460	34	1	1	5	3	1	0	80	1	5	0	0	0
461	40	1	1	3	2	0	0	70	1	6	1	0	0
462	53	2	1	1	3	0	0	70	1	6	0	0	0
463	60	2	2	3	2	1	0	90	1	0	1	0	0
464	51	1	1	1	2	0	0	0	0	6	0	0	0
465	66	1	2	4	4	0	0	30	0	1	1	0	0
466	51	1	2	1	3	1	0	50	0	1	1	0	0
467	66	1	1	5	3	1	1	0	1	4	1	0	0
468	38	1	2	4	4	0	0	70	0	0	1	0	0
469	77	1	1	5	3	1	1	70	1	5	0	0	0
470	45	1	1	5	3	1	1	0	1	6	0	0	0
471	64	1	2	5	3	1	0	0	0	0	0	0	0
472	63	1	1	5	3	0	0	0	0	1	0	0	0
473	61	1	2	5	3	0	1	0	0	0	1	0	0
474	53	1	1	5	3	0	0	0	0	4	0	0	0
475	85	1	2	4	3	1	0	0	0	1	1	0	0
476	47	1	2	4	3	1	1	20	0	0	1	0	0
477	49	2	2	2	4	0	1	60	1	3	1	0	0
478	62	1	1	4	4	0	1	0	0	4	1	0	0
479	60	1	1	5	3	0	0	10	0	0	0	0	0
480	57	1	1	5	3	1	0	90	1	6	1	0	0
481	44	1	1	4	3	1	0	90	1	1	0	0	0
482	47	1	1	1	2	0	0	90	1	3	0	0	0
483	62	2	1	1	3	1	0	0	0	4	1	0	0
484	60	2	2	1	3	1	0	0	1	1	1	0	0
485	30	2	2	3	4	1	0	0	0	1	1	0	0
486	75	2	1	2	3	0	0	80	0	6	0	0	0
487	68	2	2	3	3	1	1	0	0	4	1	0	0
488	52	2	1	5	3	1	1	90	1	3	0	0	0
489	64	1	2	4	3	0	0	0	1	3	1	0	0
490	67	2	2	5	3	0	0	0	0	6	1	0	0
491	66	1	1	1	3	1	0	0	1	1	0	0	0
492	33	1	2	5	3	1	1	80	0	4	1	0	0
493	63	1	1	1	3	1	0	60	1	3	0	0	0
494	71	1	2	4	3	1	0	75	0	5	1	0	0
495	69	1	1	4	3	1	0	0	1	6	0	0	0
496	51	1	2	2	4	1	0	90	0	0	1	0	0
497	42	1	1	5	3	1	0	90	0	6	0	0	0
498	57	2	2	5	3	1	0	0	0	5	1	0	0
499	61	1	2	2	3	1	0	0	0	0	1	0	0
500	59	2	1	5	3	1	1	90	0	4	1	0	0
501	45	2	2	5	3	1	0	80	0	3	1	0	0
502	44	2	1	5	3	1	0	0	0	0	0	0	0
503	56	2	1	2	3	1	1	90	0	3	1	0	0
504	52	2	1	3	4	0	0	60	0	3	0	0	0
505	36	2	2	5	3	1	1	40	0	3	0	0	0
506	41	1	1	4	3	1	1	0	1	1	0	0	0
507	27	1	1	4	3	1	0	0	1	6	0	0	0
508	77	1	1	3	3	1	0	60	1	6	1	0	0
509	27	2	2	5	3	1	0	0	0	6	0	0	0
